# 1 The evolution of COVID-19 in Italy after the spring 2 of 2020: an unpredicted summer respite followed by a 3 second wave

4 **Giuseppe De Natale<sup>1,2\*</sup>, Lorenzo De Natale<sup>3</sup>, Claudia Troise<sup>1,2</sup>, Vito Marchitelli<sup>4</sup>,  
5 Antonio Coviello<sup>5</sup>, Karen G. Holmberg<sup>6</sup> and Renato Somma<sup>1,5</sup>.**

6 <sup>1</sup> INGV, Osservatorio Vesuviano, 80124 Naples, Italy; [giuseppe.denatale@ingv.it](mailto:giuseppe.denatale@ingv.it)(G.D.N):  
7 [claudia.troise@ingv.it](mailto:claudia.troise@ingv.it) (C.T.); [renato.somma@ingv.it](mailto:renato.somma@ingv.it) (R.S.)

8 <sup>2</sup> CNR-INO, 80078 Pozzuoli (NA), Italy

9 <sup>3</sup> Faculty di Medicine, Università degli Studi di Napoli "Federico II", 80131 Naples, Italy [l.denatale@studenti.unina.it](mailto:l.denatale@studenti.unina.it)

10 <sup>4</sup> Department of Mobility, Public Works, Ecology, Env, Puglia Region Government, 70100 Bari, Italy  
11 [vitomarchitelli1@gmail.com](mailto:vitomarchitelli1@gmail.com)

12 <sup>5</sup> CNR-IRISS, 80134 Naples, Italy [a.coviello@iriss.cnr.it](mailto:a.coviello@iriss.cnr.it)

13 <sup>6</sup> Gallatin School of Individualized Study, New York University, USA [KGH1@nyu.edu](mailto:KGH1@nyu.edu)

14  
15  
16  
17  
18 \* Correspondence: [Giuseppe.denatale@ingv.it](mailto:Giuseppe.denatale@ingv.it); Tel.: (+39-0816108515)

19 **Abstract:** The coronavirus (COVID-19) pandemic was particularly invasive in Italy during the period  
20 between March and late April 2020 then decreased in both in the number of infections and in the seriousness  
21 of the illness throughout the summer of 2020. In this discussion, we measure the severity of the disease by  
22 the ratio of Intensive Care Units (ICU) spaces occupied by COVID-19 patients and the number of Active  
23 Cases (AC) each month from April to October 2020. We also use the ratio of the number of Deaths (D) to  
24 the number of Active Cases. What clearly emerges, from rigorous statistical analysis, is a progressive  
25 decrease in both ratios until August, indicating progressive mitigation of the disease. This is particularly  
26 evident when comparing March-April with July-August; during the summer period the two ratios became  
27 roughly 18 times lower. We test such sharp decreases against possible bias in counting active cases and we  
28 confirm their statistical significance. We then interpret such evidence in terms of the well-known seasonality  
29 of the human immune system and the virus-inactivating effect of stronger UV rays in the summer. Both  
30 ratios, however, increased again in October as ICU/AC began to increase in September 2020. These ratios  
31 and the exponential growth of infections in October indicate that the virus - if not contained by strict  
32 measures - will lead to unsustainable challenges for the Italian health system in the winter of 2020-2021 .

33 **Keywords:** Covid-19 in Italy; summer mitigation; autumn sharp increase of epidemics  
34

---

## 35 1. Introduction

36 COVID-19 had devastating effects in the months of March-May 2020 in Europe. The CFR (Case  
37 Fatality Ratio) in European countries (updated on May 26, 2020) reached peaks close to 19% in  
38 France, about 16% in Belgium, and around 14% in Italy, UK and Hungary [1, 2]. In this paper, we  
39 discuss the reasons for the high CFR in Italy and how these results could potentially be applied to  
40 other European countries with very high CFR rates. The main cause, recently confirmed by  
41 widespread randomized serological tests in Italy, was a gross underestimation of the true number  
42 of infections during the peak of the pandemic. Recent studies indicate that the more accurate  
43 number of infected people in Italy was around 1.5 million people, i.e. about six times the tested  
44 confirmed cases [3]. With such a correction, the Infection Fatality Rate (IFR), which represents the  
45 true lethality of this infection, drops to about 2.3. As occurred in Italy, it is likely that other  
46 European countries experienced a higher infection rate than was understood at the time. Another  
47 problem, experienced in the most severely impacted Italian region of Lombardy, was the near-

48 collapse of the health infrastructure accompanied by crisis management errors during the infection  
49 peak [2]. Lombardy had the highest CFR in Italy, at close to 20%. Other countries with very high  
50 CFR likely had similar contexts. It is clearly evidenced that countries with a very strong health  
51 system, like Germany, were characterised by much lower CFR [1]. Starting in May 2020, COVID-19  
52 seemed to lose much of its severity in Italy. This was evident to medical staff through direct  
53 experience with patients in the main hospitals and prompted active debates in Italy that were  
54 reported in Italian media and international press agencies [4]. Such limited, clinical observations  
55 raised political-social debates over the necessity of continued, strict containment measures. The  
56 evolution of the infection transfers and consequent illnesses during the summer and after the  
57 relaxation of the lockdown and other containment measures were far milder than expected by  
58 epidemiological forecasts [5,6]. In this paper, we statistically analyse data of ICU occupancy rates  
59 and deaths due to COVID-19 as related to the number of active cases from the end of March to  
60 October 2020. When rigorously tested, the ratio of ICU occupation to active cases and the ratio of  
61 deaths to active cases show significant shifts, thus indicating a change in the evolution of the illness  
62 from spring to summer 2020. The likely implications of such changes are then interpreted and  
63 discussed, taking into account the possible factors affecting the disease: weakening of the virus,  
64 counting bias, and seasonal effects. The results and interpretations are then discussed in light of a  
65 possible forecast of what kind of evolution we could expect in the coming months (Autumn-Winter  
66 2020-2021). Finally, we discuss the implications of these observations in the Italian context for the  
67 larger global context.

## 68 **2. Data analysis**

69 We study the global, clinical evolution of COVID-19 in Italy using data for ICU occupation  
70 numbers, deaths, and active cases in different periods. As [2] point out, ICU numbers and deaths  
71 are rather robust data whereas recording of active cases can be strongly biased by heterogeneous  
72 testing practices, loss of asymptomatic cases, etc. Recently, the first results of a massive testing  
73 campaign to randomly check the percentage of people expressing antibodies to SARS-CoV-2 were  
74 released [3]. Such tests confirm, as first hypothesized by [2], that the number of infected people was  
75 about six times larger than indicated by official tests, reaching about 1.5 million people (instead of  
76 about 250,000 officially tested positive). In the following analyses, we first assume that such high  
77 underestimation of active cases has been almost constant during the analysed period; then, we test  
78 our results with respect to the maximum bias implied by such an underestimation. Data on active  
79 cases, ICU occupation numbers, and deaths in Italy are from the Department of Italian Civil  
80 Protection Repository [8]. Here, we report the time evolution of the ratio between the number of  
81 people in ICU and the total number of 'active' cases (i.e., total less recovered and deaths, at that  
82 time), indicated by ICU/AC.

83 In order to make our estimates more robust, we choose to consider another important and robust  
84 indicator: the number of deaths. We therefore also use the ratio between the number of deaths and  
85 the number of active cases, indicated as D/AC. In order to get more accurate estimates, we also  
86 considered the average time lag from COVID-19 confirmation (the actual data on active infection  
87 we have) and the ICU admission as from COVID-19 confirmation to death. According to Wilson et  
88 al. (2020)[9], the average time lag between infection confirmation and ICU admission is 6 days  
89 whereas the average time lag between infection confirmation and death is 13 days. For this reason,  
90 we shift the median day in which we compute the active cases to 6 days before the median day of  
91 the ICU number computation; we accordingly shift the median day to compute the number of  
92 deaths to 7 days after the ICU median day (so that there are 13 days between the days of active

93 cases computation and the corresponding days of deaths computation). As April 3, 2020 was the  
94 day of maximum ICU occupation in Italy for COVID-19 cases we used the third day of each month,  
95 from April to October, as the median day to consider ICU occupation numbers. The median days  
96 for considering active cases and deaths are chosen accordingly with the described shifts: so that for  
97 active cases we take the 27th or 28th of the month before (depending if it has 30 or 31 days), and for  
98 deaths we take the 10th of each month considered. In order to obtain more robust estimates of the  
99 various data, we choose to average the data during 7 days around each median day (considering  
100 also 3 days before and 3 days after the median day). We then computed the two quantities -  
101 ICU/AC and D/AC - as the respective averages for each month. The results, for months from April  
102 to October, are reported in Table1 and Figure1.  
103

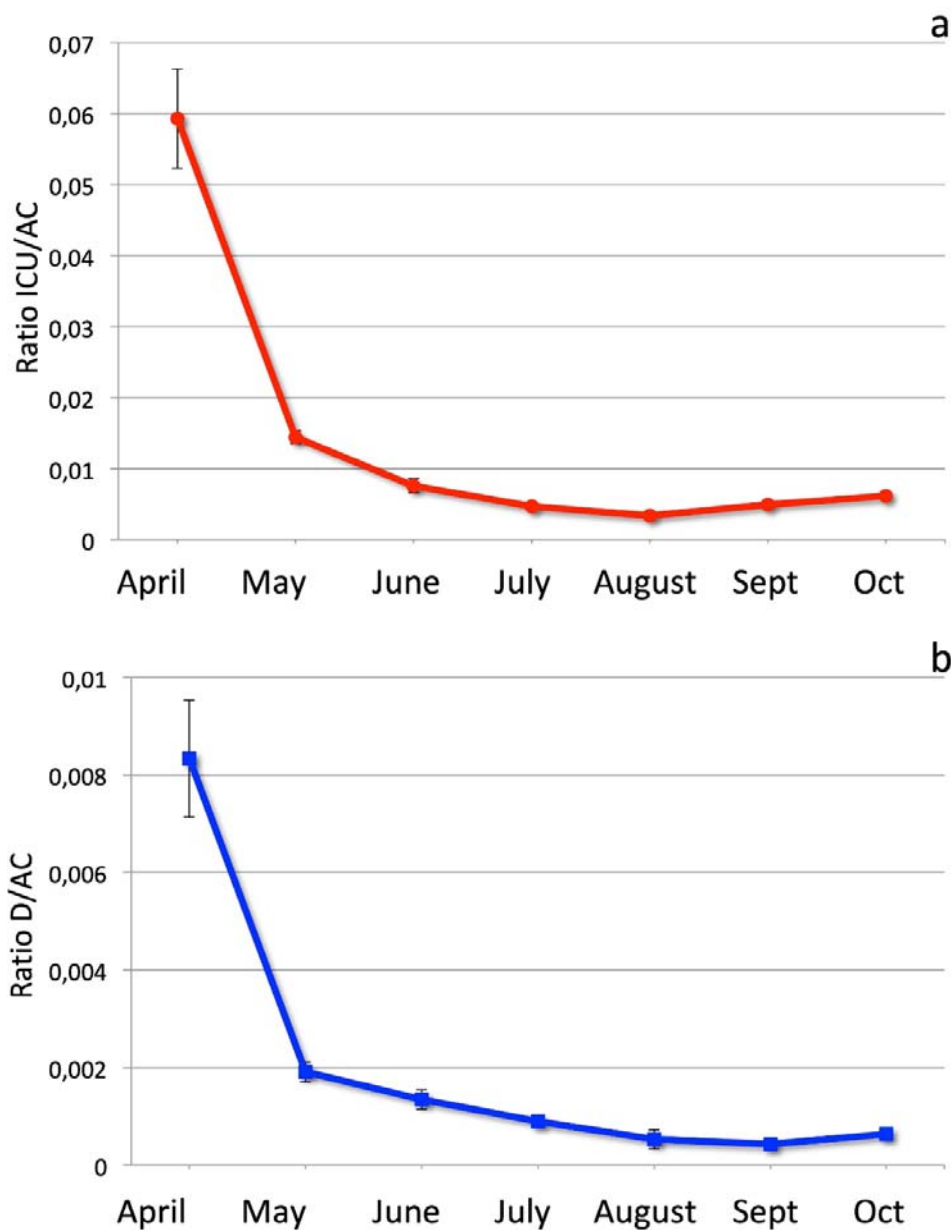

104

105 **Fig.1 a)** Ratio between ICU occupation and active cases in each month, from April to October. Error bars are as  
106 in table 1 (statistical errors at 95% probability level, i.e. two standard deviations).

107 **b)** Ratio between deaths and active cases in each month, from April to October. Error bars are as in table 1  
108 (statistical errors at 95% probability level, i.e. two standard deviations).

109

110

111

|                  | <b>Ratio ICU/AC</b> | <b>Ratio D/AC</b> |
|------------------|---------------------|-------------------|
| <b>April</b>     | 0.0593 +/- 0.0068   | 0.0083 +/- 0.0012 |
| <b>May</b>       | 0.0144 +/- 0.0008   | 0.0019 +/- 0.0008 |
| <b>June</b>      | 0.0076 +/- 0.0016   | 0.0013 +/- 0.0002 |
| <b>July</b>      | 0.0046 +/- 0.0004   | 0.0009 +/- 0.0001 |
| <b>August</b>    | 0.00334 +/- 0.00006 | 0.0005 +/- 0.0002 |
| <b>September</b> | 0.0049+/-0.0006     | 0.00042+0.0001    |
| <b>October</b>   | 0.0061+/-0.0003     | 0.00063+/-0.0001  |

112 **Table 1.** Ratios ICU/AC and D/AC. Indicated uncertainties are statistical errors computed at 95% probability  
113 level ( $2\sigma$ ).

114

115

116 The data in Figure 1 show the statistical uncertainties at 95% (2 standard deviations) and indicate  
117 that both the ratios sharply decrease in May, and then progressively continue to decrease in the  
118 summer months, with decreasing values clearly separated, well above the statistical uncertainty.

119 Another way to look at such change is to consider the ratios of ICU/AC and D/AC computed for  
120 April to each one of the following months.

121 The computed values of such ratios are reported in Table 2, and shown in Fig.2.

122

|                        | <b>Relative Ratio ICU/AC</b> | <b>Relative Ratio D/AC</b> |
|------------------------|------------------------------|----------------------------|
| <b>April/May</b>       | 4.11 +/- 0.54                | 4.37 +/- 0.84              |
| <b>April/June</b>      | 7.8 +/- 1.4                  | 6.2 +/- 1.3                |
| <b>April/July</b>      | 12.7 +/- 1.9                 | 9.3 +/- 1.8                |
| <b>April/August</b>    | 17.8 +/- 2.1                 | 15.8 +/- 3.5               |
| <b>April/September</b> | 12.0+/-2.0                   | 19.7+/-4.0                 |
| <b>April/October</b>   | 9.7+/-1.2                    | 13.2+/-3.0                 |

123 **Table 2.** Relative ratios ICU/AC and D/AC between April and following months. Indicated uncertainties are  
124 statistical errors computed at 95% probability level ( $2\sigma$ ).

125

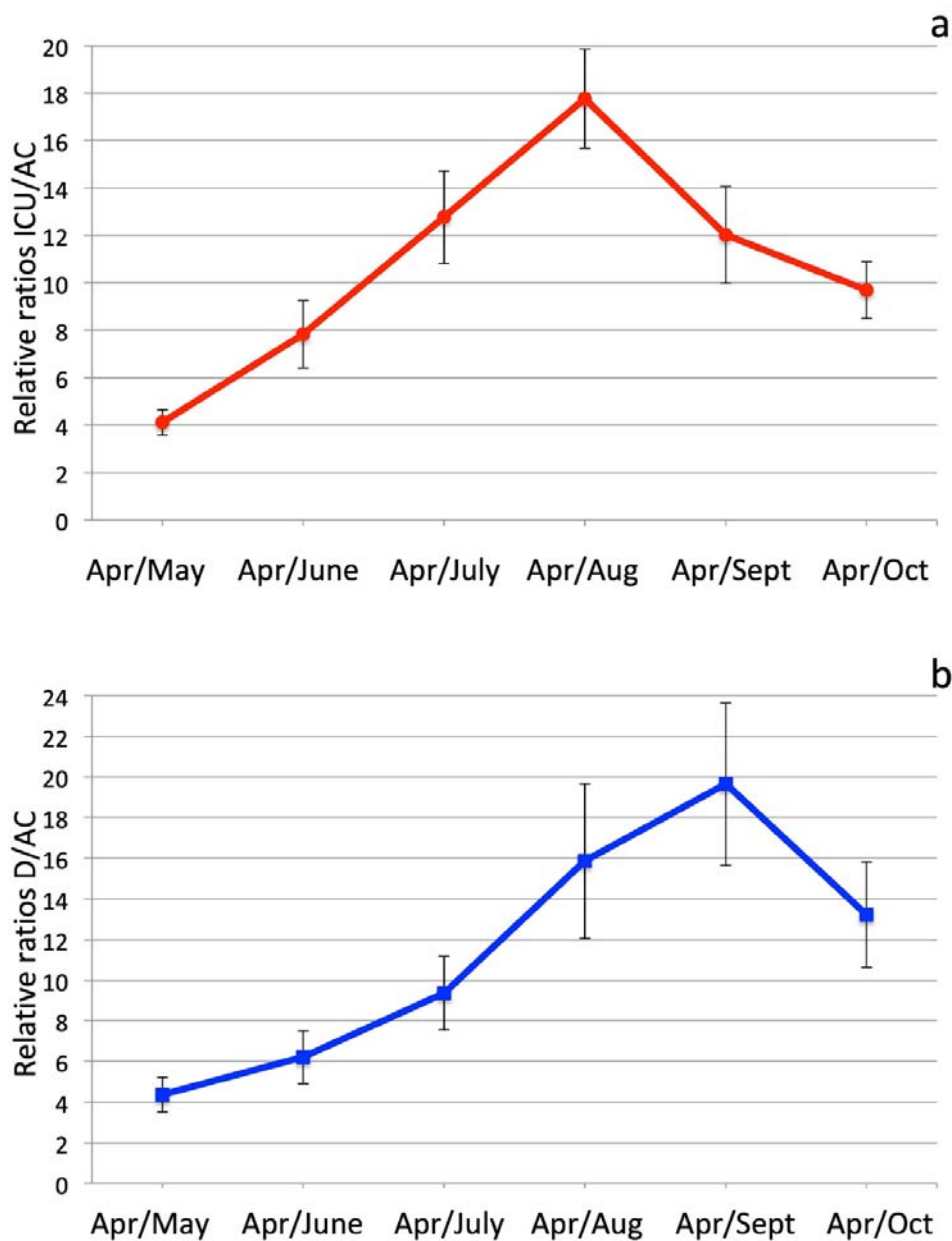

126

127 **Fig 2 a)** Relative ratios of ICU/AC in April, with respect to the following months May to August. Error bars are  
128 as in table 1 (statistical errors at 95% probability level, i.e. two standard deviations). **b)** Relative ratios of D/AC  
129 in April, with respect to the following months May to August. Error bars are as in table 1 (statistical errors at  
130 95% probability level, i.e. two standard deviations).

131

132 As is clear, both ratios progressively and rapidly increase towards and during the summer months:  
133 from April to June, the relative ratio  $(ICU/CA)_{April}/(ICU/CA)_{June}$  increases of a factor 7.9, and the  
134 relative ratios  $(D/CA)_{April}/(D/CA)_{June}$  of a factor 6.2; from April to August, the relative ratio

135 (ICU/CA)April/(ICU/CA)August increases of a factor 17.6 and the relative ratio  
136 (D/CA)April/(D/CA)August of a factor 16.7.

137 These increases are exceptionally marked. Assuming the problems of estimating the true number of  
138 active cases are constant in time they unequivocally indicate that the illness became progressively  
139 milder during the summer months. The next step, however, is to consider the maximum possible  
140 bias due to heterogeneity in the counting procedures of infected people. As we said, we are now  
141 aware of the massive underestimation of infection rates that occurred in Italy in the first months of  
142 the pandemic; serological tests indicated six times more people infected than officially tested  
143 positive [3]. Then, in order to compute the maximum bias such a fluctuating underestimation could  
144 imply in our computations we assume that all of the underestimation occurred in the months of  
145 March-April and that in the last summer months we succeeded in testing all COVID-19 positive  
146 cases. Such an assumption divides the March-April ratios (ICU/AC and D/AC) by a factor six to test  
147 the obtained values against the values computed for August (with data from July-August).

148 We then performed a rigorous test of hypothesis to determine if the observed increase of the ratios  
149 in August, with respect to the ratios in April though decreased of a factor 6, is significant. We  
150 applied the well-known Student's test [9].

151 The Student's test starts by assuming the following formula for the t-variable [9]:

152

$$153 \quad t = \frac{(\bar{X}_1 - \bar{X}_2) - (\mu_1 - \mu_2)}{\sqrt{\frac{1}{n}(s_1^2 + s_2^2)}}$$

154

(1)

155

156 where:  $\bar{X}_1$  and  $\bar{X}_2$  are the average values of ICU/AC (or D/AC) for April and August respectively,  
157 and  $s_1^2$  and  $s_2^2$  are the respective variances as computed from the samples, n is the number of  
158 samples. The number of degrees of freedom is 14-2=12 (14 is the cumulative number of the two  
159 samples tested). In the assumption of the null hypothesis,  $\mu_1$  and  $\mu_2$ , the true average values of the  
160 two samples are equal, and the value of the t-variable can be tested with respect to the Student's  
161 distribution. For our data, the values result t=9.2 for the ratios ICU/AC, and t=6.3 for the ratios  
162 D/AC, which are both largely out of 99.99% probability limits for the Student's distribution, out of  
163 the smallest limits shown in the tables. So, we can very confidently assess that the decrease of the  
164 ratios ICU/AC and D/AC, from April to August, is significant for both the variables, even if the  
165 maximum bias due to infection counting procedures is assumed, with less than 0.01% probability of  
166 being wrong.

167 After the summer months, however, both the ICU/AC and the D/AC ratios increase again. The  
168 minimum value of the first ratio, ICU/AC=0.00334, has been reached in August. In September, the  
169 ratio started to increase again, with a value ICU/AC=0.0049; in October, the increase continued,  
170 reaching a value ICU/AC=0.0061. A similar increase after the summer is shown by the ratio D/AC;  
171 differently from ICU/AC, however, the minimum value D/AC=0.00042 has been reached in  
172 September, whereas in October the ratio increased to D/AC=0.00063.

173 Such an increase of both the indicators in October is well shown by the decrease of the relative  
174 ratios April/October; the relative ICU/AC ratio from April to October decreased to 9.7, after in



175 September it had already decreased to 12.0. The relative D/AC ratio from April to October  
176 decreased to 13.2, after in September it had reached the maximum value of 19.7.

177 Following this period, both indicators of the seriousness of the disease markedly decreased starting  
178 in April 2020, reaching minimum values at the mid-end Summer (August for ICU/AC, September  
179 for D/AC). Both then show increasing values in October 2020, with ICU/AC already increased in  
180 September with respect to August. The number of deaths more sharply decreased, however,  
181 reaching a minimum value in September, that was roughly 20 times smaller than in April.

182

### 183 3. Discussion of results

184

#### 185 3.1 The summer mitigation

186 Interpreting the very clear evidence that the disease became progressively less severe, particularly  
187 in July-August, is not as simple as it would appear. The simplest explanation could be that the virus  
188 itself, which is continuously mutating and adapting to the host [10], lost much of its lethality. With  
189 COVID-19, however, we should consider that the severity of the disease is mostly determined by  
190 the response of the human immune system [11]. The scientific literature currently provides no clear  
191 evidence for the virus becoming substantially mutated and less aggressive. There is evidence for  
192 some mutations which actually made the disease less severe [12, 13]; however, there is no indication  
193 that such mutations currently have a large diffusion (or have increased compared to past months)  
194 in order to significantly mitigate the disease. Hence, the hypothesis that the observed mitigation is  
195 due to the large diffusion of a significant virus mutation lacks scientific basis. It is well known that  
196 infectious diseases [14] as well as auto-immune diseases are characterized by an evident seasonality  
197 [15, 16]. The main reason for this appears to be the seasonal variation of the human immune system  
198 response, which has been assessed even in terms of gene expression [17]. In particular, during the  
199 summer the immune system response is more effective and less inflammatory. It is proven that  
200 during European winters the human immune system has a marked pro-inflammatory character,  
201 with increased levels of soluble IL-6 receptor and C reactive protein [17]. An inflammatory response  
202 by the immune system, with cytokine storms, has been recognised as the main factor leading to  
203 lung and/or other organs failure and death [11].

204 While there is widespread evidence that almost all flu-like epidemics are strongly dampened  
205 during the summer this is even more so in the case of COVID-19: in the acute phase, COVID-19  
206 behaves like an autoimmune syndrome and so is particularly sensitive to the seasonality of the  
207 immune response [15, 17]. Other researchers previously noted some seasonal/climate effects [18,  
208 19]. In addition, it has been proven the summer sunlight rapidly inactivates Sars-Cov-2 [20].

209 The very striking mitigating effect of the summer is easily apparent, although in a partial way  
210 considering only the number of infections, by Fig.3, which shows the very clear anti-correlation  
211 between the daily number of infection and the intensity of the ultra-violet sunlight (maximum in  
212 summer months) from March to mid-October 2020.

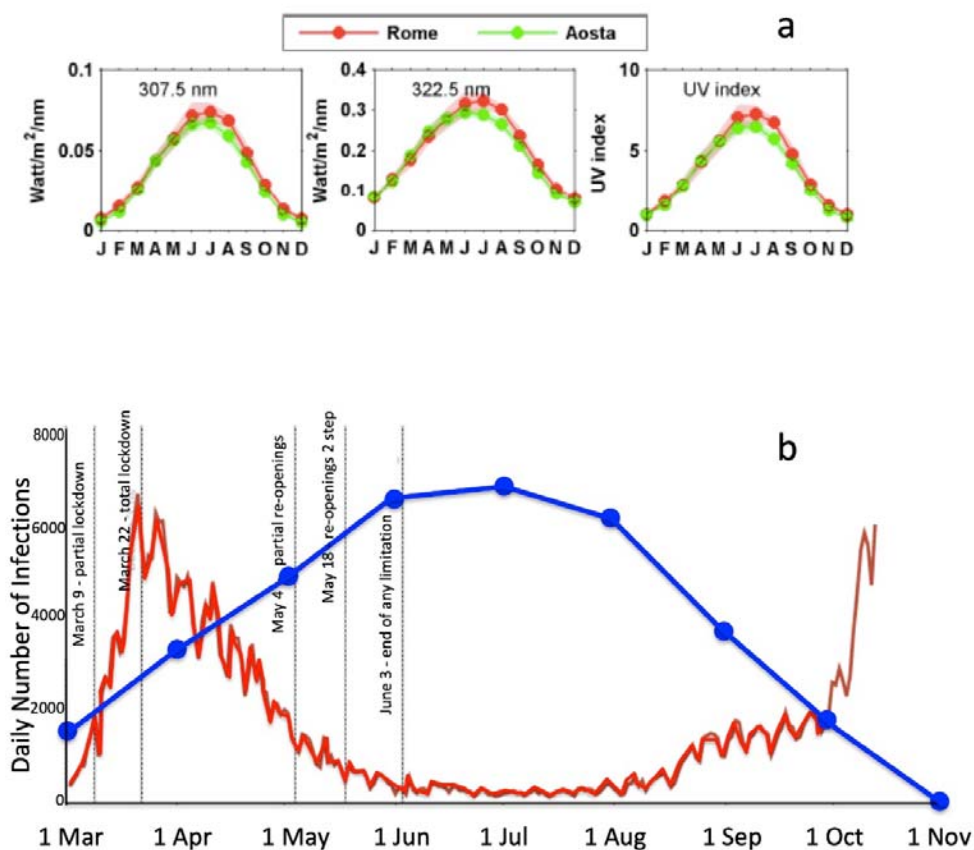

213

214 Fig3 a) From left to right: climatologies of the irradiance at 307.5 nm, 322.5 nm, and the UV index at two  
 215 stations in Italy: Aosta, Northern Italy, Rome, Central Italy, in the period 2006–2015. Shaded envelopes  
 216 correspond to the standard deviation of the climatological values and the average ratios (redrawn from [21]).  
 217 b) Comparison of the official daily infection curve in Italy from March to mid-October (red line) with the  
 218 average (2006-2015) UV intensity curve recorded at Rome station (as shown in a), in the period March to  
 219 November. Note the clear anti-correlation of the two curves, with minimum infection corresponding with  
 220 maximum UV intensity in the summer months.

221

222 The figure shows data on UV radiation intensity, as recorded at two Italian stations: one in northern  
 223 Italy (Aosta), the other, reported also in Fig.3b in comparison with the daily infection curves, in  
 224 Rome, central Italy.

225 It is important to highlight that other explanations, based on the possible bias due to  
 226 inhomogeneous counting and/or mean age of the infected people in the different periods, as often  
 227 claimed also on the basis of a relatively younger age inferred for recently recorded infections [22],  
 228 do not appear to be sufficient to explain the significant decrease of the ICU/AC and D/AC in the

229 summer months. In addition to our demonstration relative to the possible bias of inhomogeneous  
230 counting, there is compelling evidence [23] that susceptibility to the virus for individuals older than  
231 20 years is more than twice that of individuals who are younger. Such evidence makes it very  
232 unlikely that only very young people in Italy were infected in the summer months and then they  
233 did not spread the infection to the older members of the population. The most likely explanation of  
234 the inferred lower mean age of infections is that - starting in the summer months - due to the large  
235 increase of tests with respect to March-April, mostly asymptomatic cases are recorded [24], whereas  
236 in March-April only symptomatic people (comprised mainly of older individuals) were tested.  
237 Then, a very strong decrease of the seriousness of the disease in the summer months appears the  
238 only realistic explanation of data. The inference that appears is also significant due to the large  
239 disparity in the number of tests between the different periods. This is corroborated by the observed  
240 increase of the ICU/AC and D/AC after the summer, as will be discussed in the following.

241

### 242 *3.2 The second infection wave: where are we going?*

243 After the summer months, the two ratios: ICU/AC and D/AC started to increase again. The ICU/AC  
244 ratio started to rise again in September and in October reached a value (0.0061) only slightly lower  
245 than June (0.0075) but higher than September, August, and July. The D/AC ratio, on the other  
246 hands, rose again only in October, reaching a value D/AC=0.00063, higher than September and  
247 August, but lower than July.

248 It is important to stress that this increase of the two ratios after the summer further validates the  
249 significance of the summer minima. The number of tests in Italy increased progressively from only  
250 a few thousand in March to 160,000-180,000 [8, 25]. It is not possible to imagine a bias, due to the  
251 number of tests, capable of explaining the new increase of the two ratios in October or in September  
252 and October.

253 The conclusion that the epidemic was strongly mitigated by the summer appears very robust.

254 What we have described in the Italian case seems to also be able to explain the comparatively low  
255 lethality of the virus in recent months observed even in countries experiencing a very large number  
256 of infections. Countries like the USA, India, Brazil, and almost all the South American and North  
257 African countries, in which epidemics are active, are experiencing much lower CFR (Case Fatality  
258 Rates) compared to what European countries experienced in the spring of 2020 [1]. The rates in  
259 Israel (CFR=0.8), Arab Emirates (CFR=0.38), or Qatar (CFR=0.17) are extremely low (John Hopkins  
260 University, 2020 [26]). Except in a small number of cases, such as the forementioned, it is not  
261 probable that non-European countries are recording the real number of infection cases with any  
262 higher precision than the European countries. Our conclusions also validate previous observations  
263 of COVID-19 worldwide that its evolution was better mitigated in countries characterized by  
264 milder climate [18, 19, 26, 27].

265 The largely mitigated effect of COVID-19 epidemics in Italy during the summer, despite the acute  
266 situation in the months of March-April [2], also strongly validates the Italian epidemic management  
267 and lockdown strategy. We should note that just after the first reopening - in mid-May 2020 -  
268 epidemiological studies predicted a very large increase in the number of infections, severe cases,

269 and deaths [5, 6]. Instead, despite the complete re-opening implemented on June 3, 2020, such dire  
270 forecasts were proven inaccurate, confirming the appropriateness of the response and progression  
271 from complete lockdown to gradual and then full re-opening.  
272 A further confirmation of the summer mitigation effect comes from the observation of the time  
273 behavior of the ICU and Hospitalizations, from late February to late October (Fig.4). In Fig.4a a  
274 strong time decrease of the ratio between hospitalized people and active cases is evident, reaching  
275 the value, at the end of October, of about 6%. Fig.4b shows the ratio between ICU and hospitalized  
276 people, which shows a very clear minimum from the start of June to the start of September; in  
277 September and October, this ratio is approaching 10%, from a minimum value of 5%. So, the actual  
278 ratio of ICU versus active cases is around 0.6%.

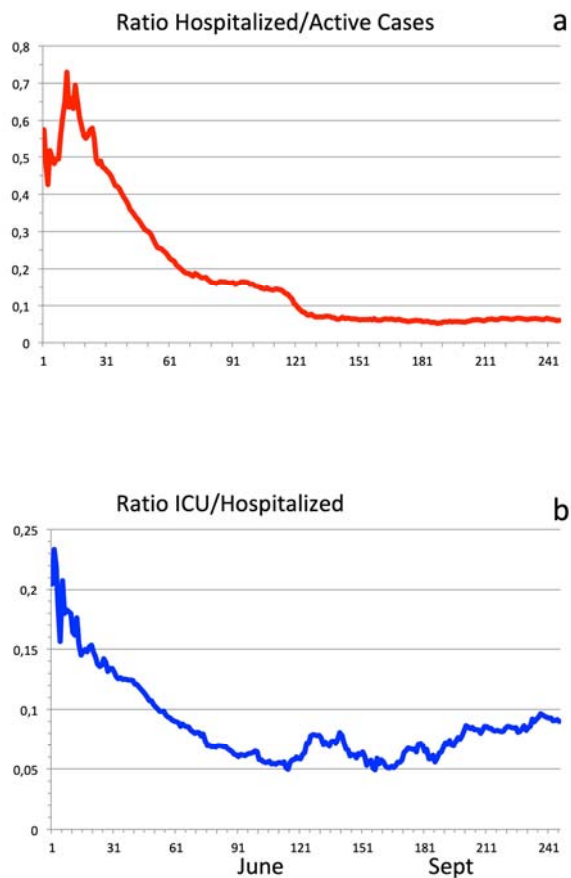

279  
280 **Fig.4 a)** Ratio between hospitalized Covid-19 patients and total number of active cases, in Italy; **b)**  
281 ratio between ICU occupation and hospitalized patients. The considered period is February 24<sup>th</sup>-  
282 October 23<sup>rd</sup>.

283  
284 However, the clear evidence for the summer mitigation also rises strong concerns about what we  
285 could expect in the winter months. Fig.5 shows the trend of daily tested cases from August 15<sup>th</sup> to  
286 October 23<sup>rd</sup>, 2020. A very sharp increase is evident in the last weeks of that period. The exponential  
287 extrapolations, ending at December 31<sup>st</sup>, were respectively computed as the best fit values for the  
288 whole period (black curve) and for the period September 15<sup>th</sup> to October 23<sup>rd</sup> (red curve).

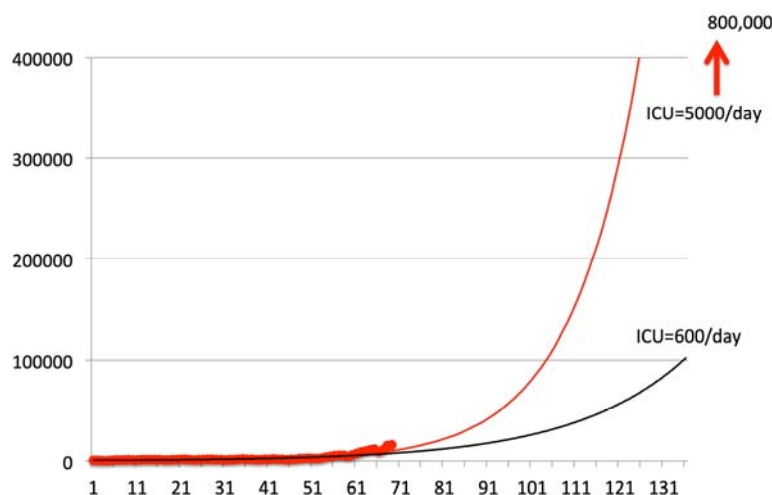

289

290 Fig.4 Extrapolated exponential curves for daily infection data since August 15th to October 23<sup>rd</sup> (red  
291 circles). The best fitting exponential curve for all data is shown by the black line; red line shows the  
292 best fitting curve using only data since September 15<sup>th</sup> to October 23<sup>rd</sup>.

293

294 Both curves show dramatically high forecasts for the future months. In the best case, the number of  
295 infections could rise to up to 100,000 per day; in the worst case, up to 800,000 infections per day  
296 could be expected. Such values imply that the corresponding daily death rates could be projected at  
297 maximum values of anywhere from 500 to 5000 deaths per day. An estimated 5% of COVID-  
298 infected people need hospitalization and about 0.6% require the use of an ICU. This could imply  
299 anywhere from 4,000 to 40,000 new hospitalizations per day and 600 to 5000 new ICU occupied per  
300 day. The impact of such numbers on the Italian health system is unsustainable.

301 The actual trend must be decreased as soon as possible to avoid the complete collapse of the  
302 hospital system. This requires urgent intensification of public health measures aimed to  
303 significantly slow the epidemic.

304

#### 305 4. Conclusions

306 We have described how the COVID-19 epidemic in Italy was significantly mitigated during the  
307 summer months of 2020. Both the infection rate and the illness criticality appeared suppressed  
308 during the summer. This is likely due to the seasonality of immune response, which is more  
309 effective and less inflammatory in the summer, combined with the germicidal property of solar UV  
310 rays. This effect was frequently misinterpreted by Italian media (and some doctors with direct  
311 clinical experience) as a mitigation of the virus and associated illness itself. The subsequent increase  
312 in ICU patients and deaths, beginning in September and October, confirm that such a mitigating  
313 effect has ended along with the summer. As further confirmation, the daily infection numbers have  
314 progressively increased starting from mid-August, with a very sharp acceleration since the end of  
315 September. These results potentially explain the very low lethality observed in countries with long  
316 lasting summer-like climate but also pose serious concerns for the late Autumn-Winter 2020-2021 in

317 temperate climate zones that experience winters. An exponential progression of the daily infection  
318 number, which is indicated by the present data, will lead to unsustainable numbers and the  
319 possible collapse of the Italian health system by the end of the winter of 2021. The severity of the  
320 COVID crisis is rising in Italy as evidenced by data collected in September-October 2020.  
321 Containment of the virus through a curtailing of new infections is vital, pressing, and the only  
322 current solution at our disposal until a vaccine and/or monoclonal antibodies are made widely  
323 available.

324  
325

## 326 References

327

- 328 1. Oke, J.; Heneghan, C. Global COVID-19 Case Fatality Rates; Nuffield Department of Primary Care  
329 Health Sciences: Oxford, UK, 2020; Available online: [https://www.cebm.net/global-COVID-19-case-](https://www.cebm.net/global-COVID-19-case-fatality-rates/)  
330 [fatality-rates/](https://www.cebm.net/global-COVID-19-case-fatality-rates/)(accessed on October 23, 2020).
- 331 2. De Natale, G.; Ricciardi, V.; De Luca, G.; De Natale, D.; Di Meglio, G.; Ferragamo, A.; Marchitelli, V.;  
332 Piccolo, A.; Scala, A.; Somma, R.; Spina, E.; Troise, C. The COVID-19 Infection in Italy: A Statistical  
333 Study of an Abnormally Severe *Disease.J. Clin. Med.* 2020, 9, 1564.
- 334 3. ISTAT Report, Primi risultati sull'indagine di sieroprevalenza sul Sars-Cov-2. 2020. Available online:  
335 <https://www.istat.it/it/files/2020/08/ReportPrimiRisultatiIndagineSiero.pdf> (In Italian, accessed on  
336 October 28, 2020)
- 337 4. Reuters. New coronavirus losing potency, top Italian doctor says, Thomson Reuters, World News  
338 May 31, 2020 Available online: [https://www.reuters.com/article/us-health-coronavirus-italy-](https://www.reuters.com/article/us-health-coronavirus-italy-virus/new-coronavirus-losing-potency-top-italian-doctor-says-idUSKBN2370OQ)  
339 [virus/new-coronavirus-losing-potency-top-italian-doctor-says-idUSKBN2370OQ](https://www.reuters.com/article/us-health-coronavirus-italy-virus/new-coronavirus-losing-potency-top-italian-doctor-says-idUSKBN2370OQ) (accessed on  
340 October 23, 2020).
- 341 5. Vespignani et al., 2020. Available online: *Il Sole 24 Ore Infodata*:  
342 [https://www.infodata.ilsole24ore.com/2020/05/24/covid-19-modeling-italy-quattro-scenari-](https://www.infodata.ilsole24ore.com/2020/05/24/covid-19-modeling-italy-quattro-scenari-prevedere-contagio/)  
343 [prevedere-contagio/](https://www.infodata.ilsole24ore.com/2020/05/24/covid-19-modeling-italy-quattro-scenari-prevedere-contagio/) (accessed on June 1, 2020).
- 344 6. Vollmer, M.A.C et al. Report 20: Using mobility to estimate the transmission intensity of COVID-19  
345 in Italy: A subnational analysis with future scenarios Technical Report; Imperial College COVID-19  
346 Response Team: London, UK, 2020. Available online: [https://www.imperial.ac.uk/mrc-global-](https://www.imperial.ac.uk/mrc-global-infectious-disease-analysis/covid-19/report-20-italy/)  
347 [infectious-disease-analysis/covid-19/report-20-italy/](https://www.imperial.ac.uk/mrc-global-infectious-disease-analysis/covid-19/report-20-italy/) (accessed on August 28, 2020)
- 348 7. Wilson, N.; Kvalsvig, A.; Barnard, L.; Baker, M.G. Case-Fatality Risk Estimates for COVID-19  
349 Calculated by Using a Lag Time for Fatality. *Emerg. Infect. Dis.* 2020, 26(6):1339-1441.  
350 <https://dx.doi.org/10.3201/eid2606.200320>
- 351 8. Department of Italian Civil Protection Repository. Available online:  
352 [http://opendatadpc.maps.arcgis.com/apps/opsdashboard/index.html#/b0c68bce2cce478eaac82fe38d4](http://opendatadpc.maps.arcgis.com/apps/opsdashboard/index.html#/b0c68bce2cce478eaac82fe38d4138b1)  
353 [138b1](http://opendatadpc.maps.arcgis.com/apps/opsdashboard/index.html#/b0c68bce2cce478eaac82fe38d4138b1) (accessed on 26 October 2020).
- 354 9. Spiegel, M. R. Theory and Problems of Probability and Statistics, *New York: McGraw-Hill*, 1992, pp.  
355 116-117
- 356 10. Geoghegan, J.L.; Holmes, E.C. The phylogenomics of evolving virus virulence. *Nat Rev Genet* 2018,  
357 19, 756-769. <https://doi.org/10.1038/s41576-018-0055-5>

- 358 11. Song, P.; Li, W.; Xie, J.; Hou, Y.; You, C. Cytokine storm induced by sars-cov-2. *Clin. Chim. Acta* **2020**,  
359 509, 280–287.
- 360 12. Young, B.E.; Fong, S.W.; Chan, Y-H; Mak, T-M.; Ang, L.W.; Anderson, D.E.; Lee, C.Y-P.; Amrun, S.N.;  
361 Lee, B.; Goh, Y.S.; Su, Y.C.F.; E Wei, W.E.; Kalimuddin, S.; Chai, L.Y.A.; Pada, S.; Tan, S.Y.; Sun, L.;  
362 Parthasarathy, P.; Chen, Y.Y.C.; Barkham, T.; Lin, R.T.P.; Maurer-Stroh, S.; Leo, Y-S.; Wang, L-F.;  
363 Renia, L.; Lee, V.J.; Smith, G.J.D.; Lye, D.C.; Ng, L.F.N.. Effects of a major deletion in the SARS-CoV-2  
364 genome on the severity of infection and the inflammatory response: an observational cohort study.  
365 *The Lancet*, 396, 10251, 603 – 611. doi: 10.1016/S0140-6736(20)31757-8
- 366 13. Benedetti, F.; Snyder, G.; Giovanetti, M.; Angeletti, S.; Gallo, R.; Ciccozzi, M.; Zella, D. Emerging of a  
367 SARS-CoV-2 viral strain with a deletion in nsp1. 2020.10.21203/rs.3.rs-62592/v1 (preprint).
- 368 14. Fishman, D. N. Seasonality of infectious diseases. *Annu. Rev. Public Health* **2007**, *28*, 127–143
- 369 15. Iikuni, N.; Nakajima, A.; Inoue, E.; Tanaka, E.; Okamoto, H.; Hara, M.; Tomatsu, T.; Kamatani, N.;  
370 Yamanaka, H. What's in season for rheumatoid arthritis patients? Seasonal fluctuations in disease  
371 activity. *Rheumatology* **2007**, *46*, 846–848. doi: 10.1093/rheumatology/kel414
- 372 16. Moltchanova, E. V.; Schreier, N.; Lammi, N.; Karvonen, M. Seasonal variation of diagnosis of Type 1  
373 diabetes mellitus in children worldwide. *Diabet. Med.* **2009**, *26*, 673–678.
- 374 17. Dopico, X.C.; Evangelou, M.; Ferreira, R.C.; Guo, H.; Pekalski, M.L.; Smyth, D.J.; Cooper, N.; Burren,  
375 O.S.; Fulford, A.J.; Hennig, B.J.; Prentice, A.M.; Ziegler, A-G.; Bonifacio, E.; Wallace, C.; Todd, J.A.,  
376 Widespread seasonal gene expression reveals annual differences in human immunity and  
377 physiology. *Nat Commun* **2015**, *6*, 7000. <https://doi.org/10.1038/ncomms8000>.
- 378 18. Scafetta, N. Distribution of the SARS-CoV-2 Pandemic and Its Monthly Forecast Based on Seasonal  
379 Climate Patterns. *Int. J. Environ. Res. Public Health*, **2020**, *17*, 3493.
- 380 19. Carleton, T.; Meng, K.C. Causal empirical estimates suggest COVID-19 transmission rates are highly  
381 seasonal, *medRxiv*, **2020** doi: <https://doi.org/10.1101/2020.03.26.20044420>
- 382 20. Ratnesar-Shumate, S.; Williams, G.; Green, B.; Krause, M.; Holland, B.; Wood, S.; Bohannon, J.;  
383 Boydston, J.; Freeburger, D.; Hooper, I.; Beck, K.; Yeager, J.; Altamura, L.A.; Biryukov, J.; Yolitz, J.;  
384 Schuit, M.; Wahl, V.; Hevey, M.; Dabisch, P. Simulated Sunlight Rapidly Inactivates SARS-CoV-2 on  
385 Surfaces, *The Journal of Infectious Diseases*, **2020**, *222*, *2*, 15, 214–222,  
386 <https://doi.org/10.1093/infdis/jiaa274>
- 387 21. Fountoulakis, I.; Diémoz, H.; Siani, A.-M.; Laschewski, G.; Filippa, G.; Arola, A.; Bais, A.F.; De  
388 Backer, H.; Lakkala, K.; Webb, A.R.; De Bock, V.; Karppinen, T.; Garane, K.; Kapsomenakis, J.;  
389 Koukoulis, M.-E.; Zerefos, C.S. Solar UV Irradiance in a Changing Climate: Trends in Europe and the  
390 Significance of Spectral Monitoring in Italy. *Environments* **2020**, *7*, 1.
- 391 22. ISS COVID-19 integrated surveillance data in Italy. **2020**. Available online:  
392 <https://www.epicentro.iss.it/en/coronavirus/sars-cov-2-dashboard> (In English, accessed on October  
393 26, 2020)
- 394 23. Davies, N.G.; Klepac, P.; Liu, Y.; Prem, K.; Jit, M.; CMMID COVID-19 working group, Eggo, R.,  
395 M. Age-dependent effects in the transmission and control of COVID-19 epidemics. *Nat Med* **2020**,  
396 *26*, 1205–1211 <https://doi.org/10.1038/s41591-020-0962-9>
- 397 24. Ministero della salute, Weekly monitoring Covid-19, report 3 - 9 August. **2020**. Available online:  
398 [http://www.salute.gov.it/portale/nuovocoronavirus/dettaglioNotizieNuovoCoronavirus.jsp?lingua=i  
399 taliano&menu=notizie&p=dalministero&id=5021](http://www.salute.gov.it/portale/nuovocoronavirus/dettaglioNotizieNuovoCoronavirus.jsp?lingua=italiano&menu=notizie&p=dalministero&id=5021) (In English, accessed on October 28, 2020)

- 400 25. INFN, Gruppo di Lavoro CovidStat INFN, 2020 Available online:  
401 [https://covid19.infn.it/mappa\\_nazionale/htmlFiles/complexDashboard\\_2020-10-](https://covid19.infn.it/mappa_nazionale/htmlFiles/complexDashboard_2020-10-)  
402 [25.html?theme=classic](https://covid19.infn.it/mappa_nazionale/htmlFiles/complexDashboard_2020-10-25.html?theme=classic) (In Italian, accessed on October 26, 2020)
- 403 26. John Hopking University, Corona virus resource centre. 2020 Available online:  
404 <https://coronavirus.jhu.edu/data/mortality> (In English, accessed on October 26, 2020)
- 405 27. Ficetola, G.F.; Rubolini, D. Climate affects global patterns of COVID-19 early outbreak dynamics,  
406 *medRxiv*,2020; doi: <https://doi.org/10.1101/2020.03.23.20040501>  
407  
408  
409
